# 1 Using insects to detect, monitor and predict the distribution of *Xylella* 2 *fastidiosa*: a case study in Corsica

3

4 Astrid Cruaud<sup>1</sup>, Anne-Alicia Gonzalez<sup>1,2</sup>, Martin Godefroid<sup>1</sup>, Sabine Nidelet<sup>1</sup>, Jean-Claude  
5 Streito<sup>1</sup>, Jean-Marc Thuillier<sup>1</sup>, Jean-Pierre Rossi<sup>1</sup>, Sylvain Santoni<sup>2</sup> and Jean-Yves Rasplus<sup>1</sup>.

6

7 <sup>1</sup>INRA, UMR1062 CBGP, F-34988 Montpellier, France.

8 <sup>2</sup>INRA, UMR1334 AGAP, F-34398 Montpellier, France.

9 \*corresponding author : astrid.cruaud@inra.fr

10

## 11 Abstract

12 We sampled *ca* 2500 specimens of *Philaenus spumarius* throughout Corsica without *a priori*  
13 on the presence of symptoms on plants. We screened 448 specimens for the presence of  
14 *Xylella fastidiosa* (*Xf*) using qPCR and a custom nested PCR. qPCR appeared versatile and  
15 under-estimated the prevalence of *Xf*. Nested PCR showed that *Xf* was present in all  
16 populations. Molecular results were validated by prediction on the distribution of *Xf* made  
17 from tests conducted on plants, which shows the pertinence of using vectors in risk  
18 assessment studies. *Xf* was detected in teneral and adults. Thus, *P. spumarius* could acquire  
19 *Xf* from its host plant, mostly *Cistus monspeliensis* in Corsica, which may act as reservoir for  
20 the next season. This contrasts with other observations and suggests that management  
21 strategies may have to be adapted on a case-by-case basis. At least two genetic entities and  
22 several variants of *Xf* not yet identified on plants were present in the insects, which suggests  
23 ancient introductions of *Xf* and a probable underestimation of the current diversity of the  
24 strains present in Corsica. Interestingly 6% of the specimens carried two subspecies. Studies  
25 are wanted to better characterize the strains present in Corsica and know how the disease was  
26 introduced, spread and why no sign of a potential epidemic was detected earlier. This study  
27 shows that, when sensitive enough methods are implemented, insects can be used to predict  
28 and better assess the exact distribution of *Xf*. Insects are indeed easy to collect, *Xf* multiply  
29 only in their foregut and does not become circulative, which facilitates its detection.

30

31 **Key words:** qPCR, nested PCR, DNA extraction, plant-disease, insect vector, *Philaenus*  
32 *spumarius*.

33

## 34 Key message

- 35 • Insect vectors can be used to detect, monitor and predict the distribution of *Xylella*
- 36 *fastidiosa*
- 37 • The widely used qPCR approach is not sensitive enough to detect low bacterial load
- 38 • Different strains/subspecies of *Xf* are widely distributed in Corsica which suggests old
- 39 introduction(s)
- 40 • Strategies to manage *Xf* may need to be set up on a case-by-case basis
- 41 • There is an urgent need to take stock of the situation in Europe to avoid unnecessary
- 42 economic pressure on certain geographical areas and agricultural sectors.

43

44

## 45 INTRODUCTION

46

47 *Xylella fastidiosa* (*Xf*) (Xanthomonadaceae, Gammaproteobacteria) is a xylem-limited Gram-  
48 negative bacterium that causes disease in important crops and ornamental plants, such as  
49 Pierce's disease of grapevine, *Citrus* variegated chlorosis disease, phony peach disease, plum  
50 leaf scald as well as leaf scorch on almond or elm and *Quercus* (Retchless et al., 2014;  
51 Almeida and Nunney, 2015 ). *Xf* infects a large number of plants (more than 300 species from  
52 more than 60 plant families) (EFSA, 2015b, a). However, the different genetic lineages  
53 exhibit narrower host-plant ranges (Nunney et al., 2013). The disease is endemic and  
54 widespread on the American continent and its biology, ecology and epidemiology have been  
55 extensively studied in the last forty years (reviewed in (Redak et al., 2004a; Chatterjee et al.,  
56 2008; Janse and Obradovic, 2010; Purcell, 2013; Retchless et al., 2014; Almeida and Nunney,  
57 2015).

58 In the last few years several subspecies of *Xf* have been detected in Europe

59 (<https://gd.eppo.int/taxon/XYLEFA/distribution>,

60 [https://ec.europa.eu/food/plant/plant\\_health\\_biosecurity/legislation/emergency\\_measures/xyle](https://ec.europa.eu/food/plant/plant_health_biosecurity/legislation/emergency_measures/xylella-fastidiosa/latest-developments_en)

61 [lla-fastidiosa/latest-developments\\_en](https://ec.europa.eu/food/plant/plant_health_biosecurity/legislation/emergency_measures/xylella-fastidiosa/latest-developments_en)). An outbreak of *Xf pauca* was first identified in Apulia

62 (southeastern Italy) in olive groves (Saponari et al., 2013a; Saponari et al., 2013b). *Xf*

63 *multiplex* was then detected on *Polygala myrtifolia* in Corsica (Chauvel et al., 2015) and

64 subsequently in continental southern France. Large-scale studies conducted in 2015 further

65 revealed that *Xf pauca* and *Xf fastidiosa-sandyi* (ST76) as well as possible recombinants were

66 also present in France (Denancé et al., 2017). Recently, *Xf multiplex* was detected in western

67 parts of the Iberian peninsula (region of Alicante) and *Xf multiplex*, *Xf pauca* and *Xf fastidiosa*  
68 were detected in the Balearic Islands (Olmo et al., 2017). *Xf fastidiosa* was also detected in  
69 Germany on a potted *Nerium* oleander kept in glasshouse in winter  
70 ([http://pflanzenesundheit.jki.bund.de/dokumente/upload/3a817\\_xylella-fastidiosa\\_pest-](http://pflanzenesundheit.jki.bund.de/dokumente/upload/3a817_xylella-fastidiosa_pest-report.pdf)  
71 [report.pdf](http://pflanzenesundheit.jki.bund.de/dokumente/upload/3a817_xylella-fastidiosa_pest-report.pdf)) and several interception of infected coffee plants have been reported in Europe  
72 ((Jacques et al., 2016; Loconsole et al., 2016),  
73 <https://gd.eppo.int/taxon/XYLEFA/distribution>).  
74 The bacterium is transmitted to plants by xylem-sap feeding leafhoppers (Hemiptera,  
75 Cicadomorpha) and members of several families are known to transmit the disease from  
76 plants to plants (Redak et al., 2004a; Redak et al., 2004b). In the Americas, Cicadellidae  
77 (Yang, 1994; Dellapé et al., 2016), spittlebugs (Cercopidae, Clastopteridae, Aphrophoridae)  
78 (Severin, 1949; Severin, 1950; Almeida et al., 2005; Krell et al., 2007), and cicadas  
79 (Cicadidae) (Paião et al., 2002; Krell et al., 2007) have been shown to efficiently transmit *Xf*.  
80 In Europe, few is known about the vectors that efficiently transmit the bacterium. So far, on  
81 the 119 potential vectors that feed on xylem sap (Chauvel et al., 2015) only *Philaenus*  
82 *spumarius* (Linnaeus, 1758), the meadow spittlebug, has been identified as an effective vector  
83 of *Xf* in southern Italy (Saponari et al., 2014; Cornara et al., 2016). Other studies are thus  
84 clearly needed to clarify whether other insects may play an important role in the epidemiology  
85 of *Xf*.  
86  
87 Usually, epidemiological survey of *Xf* is conducted on symptomatic plant material. Most  
88 frequently, the presence of the bacterium is assessed using qPCR targeting a small part of the  
89 gene *rimM* as designed in Harper et al. (2010 erratum 2013) (see Baldi & La Porta (2017) for  
90 a review of the available methods and their advantages and drawbacks). Then, if wanted,  
91 fragments of seven housekeeping genes are sequenced as defined in Yuan et al. (2010) and  
92 sequences are compared to a reference database (<http://pubmlst.org/xfastidiosa/>) to assign the  
93 strain to subspecies or detect recombinants (e.g. (Nunney et al., 2012a; Nunney et al., 2012b;  
94 European Plant Protection Organization, 2016; Jacques et al., 2016; Denancé et al., 2017).  
95 Large scale and unbiased survey of the disease requires exhaustive sampling of plants (both  
96 symptomatic and asymptomatic) in multiple habitats, which is fastidious. Furthermore, the  
97 heterogeneous distribution of the bacterium in the plant (EFSA, 2015a) as well as PCR  
98 inhibitors (e.g. polyphenols (Schrader et al., 2012)) may induce false-negative results. To the  
99 contrary, most insect vectors can be easily sampled through sweeping (among vectors only  
100 cicadas are relatively difficult to sample and may require acoustic tools to locate them).

101 Insects are also known to contain PCR inhibitors (Boncristiani et al., 2011; Shamim et al.,  
102 2014; R. Krüger USDA USA *pers. comm.*) but colonization of insects by *Xf* occurs in a non-  
103 circulative manner with bacterial colonies located in the foregut (Purcell & Finlay, 1979;  
104 observations on *Graphocephala atropunctata* (Signoret, 1854)). Thus, it is either possible to  
105 dissect the foregut of the insects or extract DNA from an entire specimen to make sure having  
106 access to the bacterium. Therefore, as suggested by the spy insect approach set up in buffer  
107 zones and symptom-less areas closed to contaminated olive groves in Italy (Yaseen et al.,  
108 2015; D'onghia, 2017; Yaseen et al., 2017), implementing massive survey to test whether or  
109 not insect populations in different ecosystems do carry *Xf* would efficiently complement  
110 studies on plants and improve the early detection and monitoring of the disease.

111  
112 Here we propose to go one step further on this idea and provide a first assessment of the use  
113 of insects to detect, monitor or predict the distribution of *Xf* in Europe, using Corsica as a case  
114 study. In a first step, we propose to test the feasibility of a large screening of insect  
115 populations for the presence of *Xf* but also for the possible characterisation of the carried  
116 strains via PCR amplification and sequencing of the loci included in the MLST of *Xf*. We  
117 sampled 62 populations of *Philaenus spumarius* throughout Corsica (Fig. 1, Table S1) from  
118 early June (when there was still a mix of larvae and adults, Fig. S1) to late October (before the  
119 adults are presumably killed by winter). We then tested for the presence of *Xf* in a subset of  
120 11 populations (448 specimens, Fig. 1, Table S1) using a qPCR approach and a nested PCR  
121 protocol designed for the purpose of the study. Indeed, targeting *Xf* using qPCR appeared  
122 inconclusive and did not allow assessing the genetic identity of the strains. In a second step,  
123 we compared the results of our molecular tests to the potential range of *Xf* as estimated using  
124 species distribution modelling based on presence / absence tests conducted on plants. In a  
125 third step, we collected occurrence data of *P. spumarius* throughout Europe and estimated its  
126 geographical range using species distribution modelling to discuss the interest of applying this  
127 spy insect approach to Europe.

128

## 129 **MATERIALS AND METHODS**

130

### 131 ***Sampling***

132 We sampled adults of *Philaenus spumarius* in 62 localities in Corsica from early June to late  
133 October (Fig. 1, Table S1) by passing a sweep net through the vegetation using alternate  
134 backhand and forehand strokes. Specimens were collected in the net with an aspirator, killed

135 on site with Ethyl Acetate and stored in 8mL vials containing 70% EtOH. Vials were stored in  
136 a freezer (-20°C) until DNA extraction. We mostly sampled in natural environments. The  
137 distance between sampling areas and the closest infested area (as identified by the national  
138 survey on plant material) ranged from ca. 20 m to 30000 m (Fig. 1). To optimize our  
139 sampling and test the feasibility of a large survey, we spent no more than 30 min sweeping in  
140 each locality. Specimens and plants on which they were successfully collected were identified  
141 to species. Molecular tests were conducted on a subset of 11 populations of *P. spumarius* (32  
142 specimens per population, Fig. 1, Table S1). Three of these populations were sampled both in  
143 early June and late October to test for a possible seasonal variation of the prevalence of *Xf*.  
144 Other populations were sampled either in June (early / late) or October. A total of 448  
145 specimens were screened for *Xf*.

146

#### 147 ***DNA extraction***

148 It seems unfeasible to proceed to the dissection of the foregut of each specimen for a mass-  
149 survey. Moreover, dissection of insects can generate cross-contamination. Thus, we tried to  
150 improve each steps of the DNA extraction protocols classically used (Bextine et al., 2004;  
151 Brady et al., 2011) to reduce the impact of PCR inhibitors that may be contained in the insects  
152 (Boncristiani et al., 2011; Shamim et al., 2014) and increase yield in bacterial DNA. The  
153 complete protocol is available in Supplementary data (Appendix 1). Briefly, insects were  
154 placed in lysis buffer that contained PVP (Polyvinylpyrrolidone, to absorb polyphenols and  
155 polyamins thus preventing them from interacting with DNA which could inhibit PCR) and  
156 Sodium Bisulfite (to prevent oxydation of polyphenols, that, when oxidized covalently bind to  
157 DNA making it useless for further application). Insects were crushed using garnet crystals and  
158 ceramic beads coated with zirconium. Then, lysozyme was added to facilitate lysis of the  
159 bacteria. After 30min incubation, Proteinase K and extraction buffer that contained guanidium  
160 chlorure (to denature proteins and increase lysis of bacterial cells) and sodium bisulfite  
161 (antioxydant) were added to the mix. After one-hour incubation, deproteneisation using  
162 potassium acetate was performed. Finally, DNA extracts were purified using a KingFisher  
163 robot and Chemagic beads.

164

#### 165 ***Quantitative PCR (qPCR)***

166 We used the method proposed by Harper et al. (2010 erratum 2013), which is listed as one of  
167 the official detection methods of *Xf* in plant material (European Plant Protection Organization,  
168 2016) and recognized as the most sensitive method available to date for the detection of *Xf* in

169 plants (Harper et al., 2010 erratum 2013; Baldi and La Porta, 2017). We followed  
170 recommendations by the ANSES (2015) and the EPPO (2016) but re-evaluated a cycle  
171 threshold using negative controls (ultrapure water and 2  $\mu$  g of phage lambda purified DNA)  
172 to better fit with our experimental conditions. To estimate the sensitivity of the qPCR  
173 approach, we used incremental dilution of an inactivated bacterial suspension of known  
174 concentration provided by B. Legendre (LSV, ANSES, Angers, France). Two replicates of  
175 qPCR were performed on each insect specimen.

176

### 177 ***Nested PCR and Sequencing***

178 Our attempt to amplify the seven loci included in the MLST of *Xf* using conventional PCR  
179 and primers / conditions described in the original protocol (Yuan et al., 2010,  
180 <https://pubmlst.org/xfastidiosa/>) were unsuccessful, probably because of the low amount of  
181 bacteria. We thus switched to a nested PCR approach. Sequences of the different alleles of  
182 each locus were downloaded from <https://pubmlst.org/xfastidiosa/> (last access October 19th  
183 2017) and aligned. Internal primers for each locus were designed from these alignments  
184 (Table S2) and primers were M13 tailed to simplify the sequencing reaction. We ensured that  
185 the nested PCR approach did not preclude discrimination among genetic entities by  
186 comparing maximum likelihood phylogenetic trees obtained from a concatenation of the 7  
187 loci originally included in the MLST of *Xf* and their reduced sequences as included in the  
188 nested PCR scheme (Fig S2). Loci extracted from all genomes available on Genbank (last  
189 access October 19th 2017) were used as input. To test for the presence of *Xf* in the insects, we  
190 first targeted *holC*. When the amplification of *holC* was successful, a nested PCR to amplify  
191 the six other loci was attempted. *HolC* was first amplified using the primers listed in Yuan et  
192 al. (2010) and the mastermix and PCR conditions described in Tables S3 and S5. Five  
193 microliters of PCR product were then used to perform a nested PCR with the mastermix and  
194 PCR conditions described in Tables S3 and S5. For the six other loci, we first performed a  
195 triplex PCR (*gltT*/*leuA*/*petC* and *cysG*/*malF*/*nuoL*) using the primers listed in Yuan et al.  
196 (2010) and the mastermix and PCR conditions described in Tables S4 and S5. Five microliters  
197 of the PCR product were then used to perform a simplex nested PCR with the mastermix and  
198 PCR conditions described in Tables S4 and S5. The strict procedure implemented to avoid  
199 carry-over contamination is detailed in the Appendix 2 of the supplementary data file. To  
200 estimate the sensitivity of the nested PCR approach, we used incremental dilution of the same  
201 inactivated bacterial suspension as for qPCR. Sequencing of the PCR products was performed  
202 at AGAP on an Applied Biosystems 3500 Genetic Analyser. Allele assignment was



203 performed using <http://pubmlst.org/xfastidiosa/>. Phylogenetic inferences were performed  
204 using raxmlHPC-PTHREADS-AVX (Stamatakis, 2014). Given that  $\alpha$  and the proportion of  
205 invariable sites cannot be optimized independently from each other (Gu, 1995) and following  
206 Stamatakis' personal recommendations (RAxML manual), a GTR +  $\Gamma$  model was applied to  
207 each gene region. We used a discrete gamma approximation (Yang, 1994) with four  
208 categories. GTRCAT approximation of models was used for ML bootstrapping (Stamatakis,  
209 2006) (1000 replicates). Resulting trees were visualised using Figtree (Rambaut, 2006).  
210 SplitsTree v.4.14.4 (Huson and Bryant, 2006) was used to build NeighborNet phylogenetic  
211 networks.

212

### 213 **Species distribution modelling of *Xf* at the Corsican scale**

214 The potential distribution of *Xf* subsp. *multiplex* (ST6 & ST7) in Corsica was modelled using  
215 BIOCLIM (Busby, 1991) and DOMAIN (Carpenter et al., 1993). Methodology followed  
216 Godefroid et al. (submitted, see comments section below for preprint DOI). Data collected in  
217 France from 2015 to 2017 by the national survey on plant material completed by occurrences  
218 from the native area of the bacterium were used as input. Results were summarized as a  
219 suitability map averaging all model predictions.

220

### 221 **Species distribution modelling of *Phileanus spumarius* at the European scale**

222 *Occurrence dataset:* A total of 1323 occurrences were used to model the distribution of *P.*  
223 *spumarius* in Europe (Fig. 6a). Of these, 471 originated from the GBIF database (GBIF.org  
224 (2017), *GBIF Home Page*. Available from: <http://gbif.org> [1rd November 2017]). The  
225 remaining 852 occurrences corresponded to our own observation records or were taken from  
226 the literature (List of references in Supplementary material, Appendix 3).

227

228 *Modelling framework:* We modelled the distribution of *P. spumarius* by means of Maxent, the  
229 most widely used species distribution model (Elith et al., 2006; Phillips et al., 2006). Maxent  
230 models the potential species distribution based on the principle of maximum entropy. It  
231 relates species occurrence records and background data with environmental descriptors to get  
232 insight into the environmental conditions that best reflect ecological requirements of the  
233 species. Species responses to environmental constraints are often complex, which implies  
234 using nonlinear functions (Elith et al., 2006). For that reason the parametrization of Maxent  
235 involves choosing among several transformations (referred to as feature classes or FCs) of  
236 original environmental descriptors (i.e. linear, quadratic, product, hinge and threshold:

237 Phillips and Dudik, 2008). The parametrization of Maxent also involves a regularization  
238 multiplier (RM) introduced to reduce overfitting (Merow et al., 2013). Various authors have  
239 highlighted that the default settings of Maxent are not optimal in all situations and might lead  
240 to poorly performing models in certain cases (Merow et al., 2013; Shcheglovitova and  
241 Anderson, 2013; Radosavljevic and Anderson, 2014) and it is sensible to search for the best  
242 parameters given the dataset at hand (Radosavljevic and Anderson, 2014).

243 We built models with RM values ranging from 0.5 to 4 with increments of 0.5 and 6 FC  
244 combinations (L, LQ, H, LQH, LQHP, LQHPT with L=linear, Q=quadratic, H=hinge,  
245 P=product and T=threshold) using the R package ENMeval (Muscarella et al., 2014). This  
246 led to 48 different models. The models were fitted using all the available occurrence points  
247 and 10,000 randomly positioned background points. The optimal settings corresponded to the  
248 models giving the minimum AICc values (see Muscarella et al., 2014, for details). The  
249 resulting optimal FC and RM values were used to fit the final Maxent model based on a  
250 training dataset constituted by a random subset of 80% of the occurrences and 10,000  
251 randomly positioned background points. The resulting Maxent model was then used to create  
252 a map of suitability scores (i.e. habitat suitability) across Western Europe (logistic output of  
253 Maxent: (Phillips and Dudik, 2008)). Suitability values were transformed into  
254 presence/absence by applying two thresholds a) the value at which the sum of the sensitivity  
255 (true positive rate) and specificity (true negative rate) is the highest and b) the highest value at  
256 which there is no omission (Liu et al., 2005b). These analyses were performed using the R  
257 package dismo (Hijmans et al., 2016).

258 We evaluated the performance of the model using the AUC metric (Fielding and Bell, 1997)  
259 and the Boyce index (Hirzel et al., 2006). The Boyce index is a reliable presence-only  
260 evaluation measure that varies between -1 and +1. Positive values indicate a model which  
261 predictions are consistent with the distribution of the presences in the evaluation dataset. The  
262 Boyce index was calculated using the R package ecospat (Broennimann et al., 2016).

263

264 *Environmental descriptors: bioclimatic variables:* Our modelling strategy relies on a set of  
265 bioclimatic descriptors hosted in the Worldclim database (Fick and Hijmans, 2017). Each  
266 variable is available in the form of a raster map and represent the average climate conditions  
267 for the period 1970-2000. We used raster layers of 2.5-minute spatial resolution, which  
268 corresponds to about 4.5 km at the equator. The choice of environmental descriptors to be  
269 involved is crucial and it is widely acknowledged that using reduced number of variables  
270 improves transferability and avoids model overparametrization (Peterson and Nakazawa,



271 2008; Jiménez-Valverde et al., 2011). We used the variables referred to as bio5, bio7 and  
272 bio19 corresponding to the maximum temperature of the warmest month, the temperature  
273 annual range and the precipitation of the coldest quarter (see details in Hijmans et al., 2005).  
274 Both temperature and precipitation were considered as proxy for the main environmental  
275 features constraining the insect distribution.

276

277

## 278 **RESULTS**

279

### 280 ***Detection of Xf in insect vectors using qPCR***

281 Based on the results obtained with the negative controls, we fixed the cycle threshold (Ct) to  
282 32.5. Thus, results were considered positive when  $Ct < 32.5$  and an exponential amplification  
283 curve was observed, results were considered negative when  $Ct > 36$  and results were  
284 considered undetermined when  $32.5 < Ct < 36$ . Sensitivity tests on the inactivated bacterial  
285 suspension indicated that the signal was lost when i) less than 100 bacteria were present in the  
286 reaction mix or ii) less than 250 bacteria mixed with 2  $\mu\text{g}$  of insect DNA were present in the  
287 reaction mix. The results of the two qPCR replicates were different for 43.8% of the insects  
288 (Fig. 2). A single positive qPCR was obtained for 2.7% of the insects collected in June. Four  
289 of the seven populations (sites A, B, D, J, Fig. 1) contained positive insects (from one to two  
290 positive insects per population). A single positive qPCR was obtained for 12.5% of the insects  
291 collected in October. Six of the seven populations (sites A, D, C, F, G, I) contained positive  
292 insects (from 3 to 7 positive insects per population). The two qPCR replicates were positive  
293 for 1.3% of the insects all collected in October from two populations (sites I: 2 positive  
294 insects; and G: 8 positive insects).

295

### 296 ***Detection of Xf in insect vectors using nested PCR and sequencing***

297 Sensitivity tests on the inactivated bacterial suspension indicated that the signal was lost when  
298 i) less than 5 bacteria were present in the reaction mix or ii) less than 50 bacteria mixed with 2  
299  $\mu\text{g}$  of insect DNA were present in the reaction mix. As compared with the qPCR approach,  
300 the nested PCR approach on *holC* revealed that *Xf* was present in all populations both in June  
301 and October with higher prevalence rates (Figs. 2 & 3). Positive nested PCR were always  
302 obtained when the results of the two qPCR replicates were positive, i.e. presumably from the  
303 insects with the highest bacterial load (collected in late October). However, positive nested  
304 PCR were also obtained when the results of the two qPCR replicates were negative (5.6% of

305 the samples). The rate of false negative as compared to the nested PCR approach was 8.7%  
306 for the first replicate of qPCR and 10.5% for the second replicate. Notably, 11.2% (resp.  
307 7.1%) of the qPCR that gave an undetermined result led to a positive nested PCR for the first  
308 replicate of qPCR (resp. the second replicate of qPCR). With the nested PCR approach, an  
309 average of 20.1% (23.2%) of the specimens were found positive to *Xf* in June (October). The  
310 prevalence of *Xf* in the different populations varied from 0.0% to 43.7 % in June and 12.5 -  
311 34.4% in October. No significant seasonal variation of the presence of *Xf* was observed.  
312 Analysis of the sequences obtained for *holC* revealed that 56.7% of the insects tested positive  
313 for *Xf* carried allele *holC\_3*, and 21.6% carried allele *holC\_1* (Table 1, Fig. 4a). It is  
314 noteworthy that two yet undescribed variants of *holC\_3* as well as two yet undescribed  
315 variants of *holC\_1* were found in the screened populations. This result is interesting *per se*  
316 and indicates that the probability that our results are due to carry-over contamination is  
317 reduced. Interestingly for a few specimens (6% of the positive samples), double peaks were  
318 observed on the diagnostic sites for allele *holC\_3* versus allele *holC\_1*, which suggest that  
319 they may carry two subspecies of *Xf*.  
320 Sequences for the seven loci of the MLST have been obtained for the specimens with the  
321 highest bacterial load (2 specimens collected in site G in October). The complete typing  
322 indicates that the carried strain was *Xf multiplex* ST7. Only partial typing (at most 2 loci)  
323 could be obtained for other specimens. Thus we could not conclude without doubt on the  
324 identity of the strains they carried. For two specimens that carried *holC\_1*, one collected in  
325 late June in site K and one collected in October in site E, sequencing of *gltT* indicates that the  
326 carried allele was *gltT\_1* and a variant of *gltT\_1* respectively, which suggests that the  
327 subspecies *Xffastidiosa* may be also present in Corsica, though this results needs to be  
328 confirmed by a complete typing. The NeighborNet network inferred from the concatenation  
329 of the reduced sequences of *leuA*, *petC*, *malF*, *cysG*, *holC*, *nuoL*, *gltT* targeted by the nested  
330 PCR approach and including reported STs, available genomes as well as Corsican strains  
331 characterized on more than one locus is presented in Figure 4b. All sequences have been  
332 deposited on Genbank (XXXX-XXX -upon acceptance-)

333

### 334 ***Match between the molecular results and the predicted distribution of *Xf multiplex* ST6 &*** 335 ***ST7***

336 All sampling sites fall within the predicted distribution of the bacterium, which encompasses  
337 the entire island apart from mountainous regions in the centre (Fig. 5). Two sampling sites  
338 (stations J & K) fall near the edge of the predicted potential distribution area of *Xf*.

339

### 340 ***Distribution of Phlebotomus spumarius at the European scale***

341 Occurrence data used in the study are presented in Figure 6a. The regularization multiplier of  
342 the Maxent model giving the minimum AICc values was 1.5 and it was associated to feature  
343 class combining linear, quadratic, hinge, product and threshold features (LQHPT). The value  
344 of the AUC of the Maxent model fitted using the latter optimal settings was 0.89 and the  
345 Boyce index was 0.986. Both metrics indicated that the Maxent model performed  
346 satisfactorily. Figure 6b displays the prediction of the Maxent model (logistic output) i.e. the  
347 habitat suitability for *P. spumarius* across the study area. Most of the Western Europe  
348 appeared to be associated to high habitat suitability values. The presence/absence maps  
349 derived from the conversion of habitat suitability using the threshold value maximizing the  
350 sensitivity and the specificity or the threshold for which there is no omission (Liu et al.,  
351 2005a) are given in Figure S3. In both cases nearly all the Western Europe appeared to host  
352 *P. spumarius*.

353

### 354 **DISCUSSION**

355

356 The idea of using insect as spies for the early detection of *Xf* in buffer zones and symptom-  
357 less areas is not new (Yaseen et al., 2015; D'onghia, 2017; Yaseen et al., 2017). Here, we tried  
358 to go one step further than what is done on olive groves in Southern Italy and propose to test  
359 whether insects could be used to detect, monitor or predict the distribution of *Xf*. We also  
360 propose to make a large-scale preliminary identification of the subspecies / strains of *Xf* that  
361 may be present in the ecosystem. If needed, whole genome sequencing could refine the  
362 identification.

363 Importantly, our study reveals some limitation of the qPCR approach sensu Harper et al.  
364 (2010 erratum 2013) to detect *Xf* in the insect vectors. The approach appears not sensitive  
365 enough to detect low bacterial load, which questions its use for the early detection of the  
366 bacterium in insects. Indeed, if we consider a result as positive only when two replicates of  
367 qPCR are positive, *Xf* will be considered as present in only two of the eleven populations and  
368 only in October. When a more sensitive approach was used no significant differences in the  
369 proportion of insects carrying *Xf* in June and in October was observed. Furthermore, the rate  
370 of undetermined results obtained with the qPCR approach is high (73.0% of the replicates  
371 with at least one undetermined result), which is unsatisfactory when it comes to the detection  
372 of plant pathogens. Although we have not formally tested a loop-mediated isothermal

373 amplification (LAMP) approach for the detection of *Xf* in the insects (an approach  
374 increasingly used on the field), our study indicates that the results obtained with this approach  
375 should be interpreted with caution. Indeed, LAMP has been shown to be less sensitive than  
376 qPCR (Harper et al., 2010 erratum 2013; Baldi and La Porta, 2017).

377 This result suggests that the lower prevalence of *Xf* in *P. spumarius* observed in early season  
378 (winter-spring, 12.6%) (Yaseen et al., 2015) as compared to late season (October-December,  
379 40%) (Elbeaino et al., 2014) in an olive grove in Italy may be artefactual. This difference may  
380 be due to the relatively poor ability of PCR and LAMP to detect *Xf* in insects with the lowest  
381 *Xf* load (more frequent in June). Consequently, we strongly advocate the use of highly  
382 sensitive methods to monitor *Xf* within insects, especially in *Xf*-free areas to avoid false  
383 negative results.

384 The nested PCR approach targeting *holC* optimized for the purpose of this study appeared  
385 much more sensitive than the qPCR approach and allows a first assessment of the diversity of  
386 the strains present in the environment. With this approach, all insect populations appeared to  
387 carry *Xf*, which shows that the bacterium is widely distributed in Corsica. The sampling sites  
388 of the 11 populations of *P. spumarius* tested positive for the presence of *Xf* all fall within the  
389 predicted potential distribution of the bacterium, which validates the plausibility of our nested  
390 PCR results and shows that molecular tests on insects could be used for risk assessment. It is  
391 noteworthy that while they were not visible when we performed sample collection in 2016,  
392 leaf scorch symptoms could be clearly observed in all localities tested for the presence of *Xf*  
393 when we went back to the field in October 2017. However, weather data indicated that the  
394 summer of 2017 has been the driest in 15 years and it is acknowledged that symptoms due to  
395 *Xf* are not easy to differentiate from drought symptoms (EFSA, 2015a). Thus, observed  
396 symptoms may be due to summer drought itself. However, the possibility that at least part of  
397 these symptoms are due to *Xf* cannot be ruled out as i) all populations of *P. spumarius* were  
398 tested positive for the presence of the bacterium ii) plants were found positive to *Xf* close to  
399 certain prospected sites (Fig. 1), iii) all sites were predicted as favourable for the bacterium  
400 (Fig. 5). The mechanisms underlying the interaction of water stress and infection by /  
401 sensibility to *Xf* and a possible causal relationships between these two parameters is a  
402 constant area of research (Thorne et al., 2006; Daugherty et al., 2010; Choi et al., 2013). It is  
403 difficult to assess whether or not the severe drought may have favoured the spread of *Xf* or  
404 revealed its presence. Regarding the vectors, studies conducted in the US on *Homalodisca*  
405 *vitripennis* Germar, 1821 have shown that the insects will take longer meal and feed more  
406 frequently on fully irrigated plants, both events that favour the acquisition and transmission of

407 *Xf* (Krugner and Backus, 2014). This led to the conclusion that even low levels of water stress  
408 may reduce the spread of *Xf* by *H. vitripennis*. However, nothing is known about the feeding  
409 behaviour of *P. spumarius* or other European insect vectors under severe drought conditions.  
410 One can hypothesize that probing behaviour may vary with more switch from one plant to  
411 another as xylem fluid tension is reduced in all plant species. However, our sampling  
412 campaigns show that *P. spumarius* may rarely switch to woody plants. Furthermore the  
413 spittlebug is subject to aestivation. Consequently the role of other potential vectors in the  
414 spread of the disease should be investigated in the future (especially cicadas).

415  
416 The wide distribution of two subspecies of *Xf* in Corsica highlighted by our molecular tests  
417 suggests that the introductions of the bacterium to Corsica may be ancient and multiple.  
418 Indeed, it appears unlikely that the bacterium spread into insect populations all over Corsica  
419 in such a short time lapse since the first detection (less than 2 years). Another argument in  
420 favour of an ancient / multiple introduction of *Xf* to Corsica is the presence of several STs,  
421 including variants either highlighted on plants (Denancé et al., 2017) and/or on insects (this  
422 study) and co-occurrence of strains / subspecies in the same matrix (plant / insect). Thus,  
423 *Polygala myrtifolia*, on which *Xf multiplex* was detected during the summer 2015, might not  
424 have been a key actor in the spread of *Xf*. This detection might just have served as a trigger  
425 for large-scale surveillance and studies that now reveal a much more complex situation than  
426 expected. Notably, the co-occurrence of subspecies / strains in the same host plant raises  
427 doubt about which entity produced symptoms and therefore on subspecies / strain occurrences  
428 used for risk assessment. Furthermore, as co-occurrence of subspecies / strains in the same  
429 host insect or plant may favour recombination, and, as a consequence enlarge host range,  
430 disease management may be further complicated (Nunney et al., 2014a; Nunney et al., 2014b;  
431 Kandel et al., 2017).

432  
433 Our results indicate that the number of bacterial cells in the cibarium of *P. spumarius* may be  
434 low, even in the late season, which complicates molecular detection. Thus, our results may  
435 still underestimate the prevalence of *Xf* in insect populations. This low amount of bacteria  
436 makes possible the PCR amplification and sequencing of all the loci included in the MLST of  
437 *Xf* only on the insects in which the bacterial load is the highest. Progress should be made to  
438 circumvent this issue and capture or other approaches that are more sensitive than PCR and  
439 nested PCR may be soon implemented. *Xf multiplex* was recovered both in plants and in  
440 insects. However, we highlighted rare or widespread subspecies / variants not yet detected in

441 plants. To the contrary, we did not detect *Xf pauca* ST53 in the targeted insect populations.  
442 These results may be explained by the followings: i) *Xf pauca* or our rare variants may be  
443 restricted to some areas where insect / plant prospection was not yet conducted, ii) some  
444 strains are harder to detect in plants (competition between PCR primers or differences in  
445 development). With survey effort, results on plants and insects should become consistent.  
446  
447 Obviously, we did not aim to study the entire community of vectors of *Xf* occurring in  
448 Corsica. Our goal was to gather huge populations of the same species of vector in each  
449 locality to perform molecular tests. Doing this, *P. spumarius*, which is, by the way, the only  
450 efficient vector known in Europe so far (Saponari et al., 2014; Cornara et al., 2016), was  
451 identified as the perfect candidate. While we did not aim at studying the exact phenology and  
452 host preferences of *P. spumarius*, we made a couple of biological observations that will need  
453 to be formally tested but seem nevertheless relevant to propose a few immediate solutions to  
454 decrease its potential impact on cultivated plants.  
455 Interestingly, specimens of *P. spumarius* were easily and almost exclusively collected from  
456 *Cistus monspeliensis* with only a few specimens collected in grasses and clover. In 2016,  
457 adults started to emerge in early June, were impossible to collect in summer as mentioned by  
458 Chauvel et al. (2015) and huge adult populations reappeared in early October with the first  
459 rains. No survey was conducted in winter. We are thus unable to state whether or not adults of  
460 *P. spumarius* may survive winter in some areas. The mix of larvae and teneralis observed in  
461 many localities in early June suggest they may not survive winter but this needs to be  
462 confirmed especially in a context of global warming. Our observations contrast with  
463 observations made in Apulian olive groves (Southern Italy) by Ben Moussa et al. (2016)  
464 where *P. spumarius* begins to molt in april-may, is abundant in summer and seems more  
465 polyphagous as it moves from herbaceous plants to olive trees. It is noteworthy that *P.*  
466 *spumarius* is also polyphagous in Southern France as larvae were found on *ca* 120 different  
467 species of plants in the area of Montpellier (JCS, *pers. obs.*). Therefore, the situation in  
468 Corsica appears different from what has been observed elsewhere in Europe. While host  
469 preferences, exact phenology and tolerance to temperature variation of the Corsican  
470 populations of *P. spumarius* require to be precisely assessed in the future, performing a  
471 genetic analysis to evaluate their status appears also relevant. On a more general note, the  
472 contrasted observations on *P. spumarius* suggest that strategies that would need to be set up to  
473 monitor the spread of the disease would differ from areas to areas. Our field samplings and  
474 observations of huge numbers of spitlike foam on *Cistus monspeliensis* in the spring suggest



475 that this widespread plant may play a critical role in the spread of the bacterium in Corsica. *Xf*  
476 was detected in young and older adults of *P. spumarius* which suggests that the insects could  
477 acquire the bacterium from *C. monspeliensis*, which may act as reservoir for the next season.  
478 Thus, *C. monspeliensis*, which, from our observation, seems mostly asymptomatic to *Xf* (but  
479 was already tested positive to *Xf* on plants (Denancé et al., 2017)), could have favoured an  
480 initially invisible spread of the disease throughout Corsica. *Cistus monspeliensis* may thus  
481 have played the role of the hidden compartment suggested by one of the model selected by  
482 Soubeyrand et al. (submitted,  
483 [https://www.efsa.europa.eu/sites/default/files/event/171113/171113-7.5\\_Soubeyrand.pdf](https://www.efsa.europa.eu/sites/default/files/event/171113/171113-7.5_Soubeyrand.pdf)) to  
484 best explain current observations on plants. If a key role of *P. spumarius* or *C. monspeliensis*  
485 is confirmed by further studies, disease management in Corsica may be trickier in natural  
486 ecosystems than in agro-ecosystems. Indeed, *Cistus* spp. are largely distributed in anthropized  
487 and open semi-natural habitats. They are major components of the spontaneous natural  
488 reforestation that generally follows abandonment of agriculture and grazing and are among the  
489 first colonizers after a fire. While it seems feasible to remove *Cistus* spp. from the vicinity of  
490 crops, other strategies should be implemented to control the spread of *Xf* in natural  
491 environments.

492  
493 Interestingly, the species distribution model of *P. spumarius* at the European scale indicates  
494 that it may be the perfect sentinel to detect the presence of *Xf* and make a preliminary  
495 assessment of the subspecies / strains present in the environment. As a conclusion, we suggest  
496 that a study of this type in Europe will provide a better picture of the spread of the bacterium  
497 and set up a global strategy to control it. There is an urgent need to take stock of the current  
498 situation with a large-scale, blind survey and using effective / sensitive enough molecular  
499 tools. This may allow finding out why the current epidemic appears so recent, understand  
500 what could be the triggers, better design management strategies, and avoid the unnecessary  
501 economic pressure on certain geographical areas and agricultural sectors. It is even more  
502 urgent as global warming may favour the (re)-emergence of *Xf* and predictions at the  
503 European scale suggest that *Xf* may be more widespread than what is currently thought  
504 (Godefroid et al., submitted, see comments section below for preprint DOI)

505

#### 506 **Author's contribution:**

507 Designed the study: AC, JYR; collected samples: AC, JYR, MG, JCS, JMT; developed /  
508 wrote protocols and conducted laboratory work: AAG, SS; performed species distribution

509 modelling: MG, JPR; discuss the results: AC, AAG, SN, JPR, SS, JYR; wrote the manuscript:  
510 AC, JYR. All authors commented on the manuscript.

511

### 512 **Foundings:**

513 This work was funded by grants from the SPE department of the INRA (National Agronomic  
514 Institute), the territorial collectivity of Corsica and the Horizon 2020 XF-ACTORS Project  
515 SFS-09-2016. The funders had no role in study design, data collection and analysis, decision  
516 to publish, or preparation of the manuscript.

517

### 518 **Acknowledgements:**

519 We thank B. Legendre from the ANSES LSV (Angers, France) for providing an inactivated  
520 bacterial suspension to test the sensitivity of our methods. We thank M.-A. Jacques (INRA,  
521 IRHS, Angers, France) for helpful discussion as well as F. Casabianca (INRA, Corte, France)  
522 and L. Hugot (CNBC Corse, France) for their collaboration in setting up a research project in  
523 Corsica. We are indebted to C. Lannou (INRA, SPE, France) for his interest and support  
524 during the course of the project.

525

### 526 **Competing Interests:**

527 The authors have declared that no competing interests exist.

528

### 529 **References:**

- 530 Almeida, R.P., Blua, M.J., Lopes, J.R.S., Purcell, A.H., 2005. Vector transmission of *Xylella*  
531 *fastidiosa*: Applying fundamental knowledge to generate disease management  
532 strategies. *Annals of the Entomological Society of America* 98, 775-786.
- 533 Almeida, R.P., Nunney, L., 2015. How do plant diseases caused by *Xylella fastidiosa* emerge  
534 ? *Plant Disease* 99, 1457-1467.
- 535 ANSES, 2015. Détection de *Xylella fastidiosa* par PCR en temps réel sur plantes hôtes.  
536 ANSES/ LSV / MA 039 version 1. Available from :  
537 [https://http://www.anses.fr/fr/system/files/ANSES\\_MA039\\_Xylellafastidiosa\\_final.pdf](https://http://www.anses.fr/fr/system/files/ANSES_MA039_Xylellafastidiosa_final.pdf)  
538 [f](#)
- 539 Baldi, P., La Porta, N., 2017. *Xylella fastidiosa*: host range and advance in molecular  
540 identification techniques. *Frontiers in Plant Science* 8, 944.
- 541 Ben Moussa, I.E., Mazzoni, V., Valentini, F., Yaseen, T., Lorusso, D., Speranza, S., Digiaro,  
542 M., Varvaro, L., Krügner, R., D'Onghia, A.M., 2016. Seasonal fluctuations of sap-  
543 feeding insect species infected by *Xylella fastidiosa* in Puglia olive groves of Southern  
544 Italy. *Journal of Economic Entomology* 109, 1512-1518.
- 545 Bextine, B., Tuan, S.J., Shaikh, H., Blua, M., Miller, T.A., 2004. Evaluation of methods for  
546 extracting *Xylella fastidiosa* DNA from the glassy-winged sharpshooter. *Journal of*  
547 *Economic Entomology* 97, 757-763.

- 548 Boncristiani, H., Li, J., Evans, J., Pettis, J., Chen, Y., 2011. Scientific note on PCR inhibitors  
549 in the compound eyes of honey bees, *Apis mellifera*. *Apidologie* 42, 457-460.
- 550 Brady, J.A., Faske, J.B., Castañeda-Gill, J.M., King, J.L., Mitchell, F.L., 2011. High-  
551 throughput DNA isolation method for detection of *Xylella fastidiosa* in plant and  
552 insect samples. *Journal of Microbiological Methods* 86, 310-312.
- 553 Broennimann, O., Di Cola, V., Guisan, A., 2016. ecospat: Spatial Ecology Miscellaneous  
554 Methods. version 2.1.1. <https://CRAN.R-project.org/package=ecospat>.
- 555 Busby, J.R., 1991. BIOCLIM: a bioclimate analysis and prediction system. *Plant Protection*  
556 *Quarterly* 6, 8-9.
- 557 Carpenter, G., Gillison, A.N., Winter, J., 1993. DOMAIN: a flexible modelling procedure for  
558 mapping potential distributions of plants and animals. *Biodiversity and conservation*  
559 2, 667-680.
- 560 Chatterjee, S., Almeida, R.P.P., Lindow, S., 2008. Living in two worlds: the plant and insect  
561 lifestyles of *Xylella Fastidiosa*. *Annual Review of Phytopathology* 46, 243-271.
- 562 Chauvel, G., Cruaud, A., Legendre, B., Germain, J.-F., Rasplus, J.-Y., 2015. Rapport de  
563 mission d'expertise sur *Xylella fastidiosa* en Corse. Available at  
564 [http://agriculture.gouv.fr/sites/minagri/files/20150908\\_rapport\\_mission\\_corse\\_xylella](http://agriculture.gouv.fr/sites/minagri/files/20150908_rapport_mission_corse_xylella_31082015b.pdf)  
565 [31082015b.pdf](http://agriculture.gouv.fr/sites/minagri/files/20150908_rapport_mission_corse_xylella_31082015b.pdf).
- 566 Choi, H.-K., Iandolino, A., Silva, F.G., Cook, D.R., 2013. Water deficit modulates the  
567 response of *Vitis vinifera* to the Pierce's disease pathogen *Xylella fastidiosa*.  
568 *Molecular Plant-Microbe Interactions* 26, 643-657.
- 569 Cornara, D., Cavalieri, V., Dongiovanni, C., Altamura, G., Palmisano, F., Bosco, D., Porcelli,  
570 F., Almeida, R.P.P., Saponari, M., 2016. Transmission of *Xylella fastidiosa* by  
571 naturally infected *Philaenus spumarius* (Hemiptera, Aphrophoridae) to different host  
572 plants. *Journal of Applied Entomology* 141, 80-87.
- 573 D'onghia, A.M., 2017. CIHEAM/IAMB innovative tools for early surveillance and detection  
574 of *Xylella fastidiosa*. In: D'Onghia, A.M., Brunel, S., Valentini, F. (Eds.), *Xylella*  
575 *fastidiosa* & the Olive Quick Decline Syndrome (OQDS) A serious worldwide  
576 challenge for the safeguard of olive trees - IAM Bari: CIHEAM (Centre International  
577 de Hautes Etudes Agronomiques Méditerranéennes), 2017 – 172 p. (Série A  
578 Mediterranean Seminars, N° 121, Options Méditerranéennes).
- 579 Daugherty, M.P., Lopes, J.R.S., Almeida, R.P.P., 2010. Strain-specific alfalfa water stress  
580 induced by *Xylella fastidiosa*. *European Journal of Plant Pathology* 127, 333-340.
- 581 Dellapé, G., Paradell, S., Semorile, L., Delfederico, L., 2016. Potential vectors of *Xylella*  
582 *fastidiosa*: a study of leafhoppers and treehoppers in citrus agroecosystems affected by  
583 Citrus Variegated Chlorosis. *Entomol. Exp. Appl.* 161, 92-103.
- 584 Denancé, N., Legendre, B., Briand, M., Olivier, V., de Boisseson, F., Poliakoff, F., Jacques,  
585 M.-A., 2017. Several subspecies and sequence types are associated with the  
586 emergence of *Xylella fastidiosa* in natural settings in France. *Plant Pathology* 66,  
587 1054-1064.
- 588 EFSA, 2015a. Panel on Plant Health (PLH), European Food Safety Authority (EFSA),  
589 Scientific Opinion on the risk to plant health posed by *Xylella fastidiosa* in the EU  
590 territory, with the identification and evaluation of risk reduction, *EFSA Journal*  
591 2015;13(1):3989.
- 592 EFSA, 2015b. Scientific opinion on the risks to plant health posed by *Xylella fastidiosa* in the  
593 EU territory, with the identification and evaluation of risk reduction options. *EFSA*  
594 *Journal* 13, 2989.
- 595 Elbeaino, T., Yaseen, T., Valentini, F., Ben Moussa, I.E., Mazzoni, V., D'onghia, A.M.,  
596 2014. Identification of three potential insect vectors of *Xylella fastidiosa* in southern  
597 Italy. *Phytopathologia Mediterranea* 53, 328-332.

- 598 Elith, J., Graham, C.H., Anderson, R.P., Dudík, M., Ferrier, S., Guisan, A., Hijmans, R.J.,  
599 Huettmann, F., Leathwick, J.R., Lehmann, A., 2006. Novel methods improve  
600 prediction of species' distributions from occurrence data. *Ecography* 29, 129-151.
- 601 European Plant Protection Organization, 2016. EPPO Standards PM 7 – Diagnostics PM 7/24  
602 (2) *Xylella fastidiosa*. *Bulletin OEPP/EPPO Bulletin* 46, 463–500.
- 603 Fick, S.E., Hijmans, R.J., 2017. WorldClim 2: new 1-km spatial resolution climate surfaces  
604 for global land areas. *International Journal of Climatology* 37, 4302-4315.
- 605 Fielding, A.H., Bell, J.F., 1997. A review of methods for the assessment of prediction errors  
606 in conservation presence/absence models. *Environmental conservation* 24, 38-49.
- 607 Giampetruzzi, A., Loconsole, G., Boscia, D., Calzolari, A., Chiumenti, M., Martelli, G.P.,  
608 Saldarelli, P., Almeida, R.P., Saponari, M., 2015. Draft genome sequence of CO33, a  
609 coffee-infecting isolate of *Xylella fastidiosa*. *Genome Announcements* 3, e01472–  
610 01415.
- 611 Gu, X., 1995. Maximum likelihood estimation of the heterogeneity of substitution rate among  
612 nucleotide sites. *Molecular Biology and Evolution* 12, 546-557.
- 613 Harper, S.J., Ward, L.I., Clover, G.R.G., 2010 erratum 2013. Development of LAMP and  
614 real-time PCR methods for the rapid detection of *Xylella fastidiosa* for quarantine and  
615 field applications. *Phytopathology* 12, 1282-1288.
- 616 Hijmans, R.J., E., C.S., Parra, J.L., Jones, P.G., Jarvis, A., 2005. Very high resolution  
617 interpolated climate surfaces for global land areas. *International Journal of*  
618 *Climatology* 25, 1965-1978.
- 619 Hijmans, R.J., Phillips, S., Leathwick, J., Elith, J., 2016. dismo: Species Distribution  
620 Modeling. R package version 1.1-4. <https://CRAN.R-project.org/package=dismo>.
- 621 Hirzel, A.H., Le Lay, G., Helfer, V., Randin, C., Guisan, A., 2006. Evaluating the ability of  
622 habitat suitability models to predict species presences. *Ecological Modelling* 199, 142-  
623 152.
- 624 Huson, D.H., Bryant, D., 2006. Application of phylogenetic networks in evolutionary studies.  
625 *Molecular Biology and Evolution* 23, 254-267.
- 626 Jacques, M.-A., Denancé, N., Legendre, B., Morel, E., Briand, M., Mississipi, S., Durand, K.,  
627 Olivier, V., Portier, P., Poliakoff, F., Cruzillat, D., 2016. New coffee-infecting  
628 *Xylella fastidiosa* variants derived via homologous recombination. *Applied and*  
629 *Environmental Microbiology* 82, 1556-1568.
- 630 Janse, J., Obradovic, A., 2010. *Xylella fastidiosa*: its biology, diagnosis, control and risks.  
631 *Journal of Plant Pathology*, S35-S48.
- 632 Jiménez-Valverde, A., Peterson, A.T., Soberón, J., Overton, J.M., Aragón, P., Lobo, J.M.,  
633 2011. Use of niche models in invasive species risk assessments. *Biological Invasions*  
634 13, 2785-2797.
- 635 Kandel, P.P., Almeida, R.P., Cobine, P.A., De La Fuente, L., 2017. Natural competence rates  
636 are variable among *Xylella fastidiosa* strains and homologous recombination occurs in  
637 vitro between subspecies *fastidiosa* and *multiplex*. *Molecular Plant-Microbe*  
638 *Interactions* 30, 589-600.
- 639 Krell, R.K., Boyd, E.A., Nay, J.E., Park, Y.L., Perring, T.M., 2007. Mechanical and insect  
640 transmission of *Xylella fastidiosa* to *Vitis vinifera*. *American Journal of Enology and*  
641 *Viticulture* 58, 211-216.
- 642 Krugner, R., Backus, E.A., 2014. Plant water stress effects on stylet probing behaviors of  
643 *Homalodisca vitripennis* (Hemiptera: Cicadellidae) associated with acquisition and  
644 inoculation of the bacterium *Xylella fastidiosa*. *Journal of Economic Entomology* 107,  
645 66-74.
- 646 Liu, C., Berry, P.M., Dawson, T.P., Pearson, R.G., 2005a. Selecting thresholds of occurrence  
647 in the prediction of species distributions. *Ecography* 28, 385-393.

- 648 Liu, C., Berry, P.M., Dawson, T.P., Pearson, R.G., 2005b. Selecting thresholds of occurrence  
649 in the prediction of species distributions. 28, 385--393.
- 650 Loconsole, G., Saponari, M., Boscia, D., D'Attoma, G., Morelli, M., Martelli, G.P., Almeida,  
651 R.P.P., 2016. Intercepted isolates of *Xylella fastidiosa* in Europe reveal novel genetic  
652 diversity. *European Journal of Plant Pathology* 146, 85.
- 653 Merow, C., Smith, M.J., Silander, J.A., 2013. A practical guide to MaxEnt for modeling  
654 species' distributions: what it does, and why inputs and settings matter. *Ecography* 36,  
655 1058--1069.
- 656 Muscarella, R., Galante, P.J., Soley-Guardia, M., Boria, R.A., Kass, J.M., Uriarte, M.,  
657 Anderson, R.P., 2014. ENMeval: An R package for conducting spatially independent  
658 evaluations and estimating optimal model complexity for Maxent ecological niche  
659 models. *Methods in Ecology and Evolution* 5, 1198--1205.
- 660 Nunney, L., Elfekih, S., Stouthamer, R., 2012a. The importance of multilocus sequence  
661 typing: Cautionary tales from the bacterium *Xylella fastidiosa*. *Phytopathology* 102,  
662 456-460.
- 663 Nunney, L., Hopkins, D.L., Morano, L.D., Russell, S.E., Stouthamer, R., 2014a.  
664 Intersubspecific recombination in *Xylella fastidiosa* strains native to the United States:  
665 Infection of novel hosts associated with an unsuccessful invasion. *Applied and  
666 Environmental Microbiology* 80, 1159-1169.
- 667 Nunney, L., Schuenzel, E.L., Scally, M., Bromley, R.E., Stouthamer, R., 2014b. Large-scale  
668 intersubspecific recombination in the plant-pathogenic bacterium *Xylella fastidiosa* is  
669 associated with the host shift to mulberry. *Applied and Environmental Microbiology*  
670 80, 3025--3033.
- 671 Nunney, L., Vickerman, D.B., Bromley, R.E., Russell, S.A., Hartman, J.R., Morano, L.D.,  
672 Stouthamer, R., 2013. Recent evolutionary radiation and host plant specialization in  
673 the *Xylella fastidiosa* subspecies native to the United States. *Applied and  
674 Environmental Microbiology* 79, 2189-2200.
- 675 Nunney, L., Yuan, X., Bromley, R.E., Stouthamer, R., 2012b. Detecting genetic introgression:  
676 high levels of intersubspecific recombination found in *Xylella fastidiosa* in Brazil.  
677 *Applied and Environmental Microbiology* 78, 4702-4714.
- 678 Olmo, D., Nieto, A., Adrover, F., Urbano, A., Beidas, O., Juan, A., Marco-Noales, E., López,  
679 M.M., Navarro, I., Monterde, A., Montes-Borrego, M., Navas-Cortés, J.A., Landa,  
680 B.B., 2017. First detection of *Xylella fastidiosa* infecting cherry (*Prunus avium*) and  
681 *Polygala myrtifolia* plants, in Mallorca Island, Spain. *Plant Disease* 101, 1820-1820.
- 682 Paião, F., Meneguim, A., Casagrande, E., Leite, R., 2002. Envolvimento de cigarras  
683 (Homoptera, Cicadidae) na transmissão de *Xylella fastidiosa* em cafeeiro. *Fitopatol.*  
684 *Bras.* 27, 67.
- 685 Peterson, A.T., Nakazawa, Y., 2008. Environmental data sets matter in ecological niche  
686 modelling: an example with *Solenopsis invicta* and *Solenopsis richteri*. *Global  
687 Ecology and Biogeography* 17, 135-144.
- 688 Phillips, S.J., Anderson, R.P., Schapire, R.E., 2006. Maximum entropy modeling of species  
689 geographic distributions. *Ecological Modelling* 190, 231--259.
- 690 Phillips, S.J., Dudik, M., 2008. Modeling of species distributions with Maxent: new  
691 extensions and a comprehensive evaluation. *Ecography* 31, 161--175.
- 692 Purcell, A.H., 2013. Paradigms: examples from the bacterium *Xylella fastidiosa*. *Annual  
693 Review of Phytopathology* 51, 339-356.
- 694 Purcell, A.H., Finlay, A., 1979. Evidence for non-circulative transmission of Pierce's disease  
695 bacterium by sharpshooter leafhoppers. *Phytopathology* 69, 393--395.



- 696 Radosavljevic, A., Anderson, R.P., 2014. Making better Maxent models of species  
697 distributions: complexity, overfitting and evaluation. *Journal of Biogeography* 41,  
698 629--643.
- 699 Rambaut, A., 2006. FigTree. Available online at <http://tree.bio.ed.ac.uk/software/figtree/>.
- 700 Redak, R.A., Purcell, A.H., Lopes, J.R., Blua, M.J., Mizel, R.F., Andersen, P.C., 2004a. The  
701 biology of Xylem fluid-feeding insect vectors of *Xylella fastidiosa* and their relation to  
702 disease epidemiology. *Annual Review of Entomology* 49, 243-270.
- 703 Redak, R.A., Purcell, A.H., Lopes, J.R.S., Blua, M.J., Mizell, R.F., Andersen, P.C., 2004b.  
704 The biology of xylem fluid-feeding insect vectors of *Xylella fastidiosa* and their  
705 relation to disease epidemiology. *Annu. Rev. Entomol.* 49, 243-270.
- 706 Retchless, A.C., Labroussaa, F., Shapiro, L., Stenger, D.C., Lindow, S.E., Almeida, R.P.,  
707 2014. Genomic insights into *Xylella fastidiosa* interactions with plant and insect hosts.  
708 In: Heidelberg, S.B. (Ed.), *Genomics of Plant-Associated Bacteria* pp. 177-202.
- 709 Saponari, M., Boscia, D., Nigro, F., Martelli, G.P., 2013a. Identification of DNA sequences  
710 related to *Xylella fastidiosa* in oleander, almond and olive trees exhibiting leaf scorch  
711 symptoms in Apulia (Southern Italy). *Journal of Plant Pathology* 95, 668.
- 712 Saponari, M., Loconsole, G., Cornara, D., Yokomi, R.K., De Stradis, A., Boscia, D., Bosco,  
713 D., Martelli, G.P., Krugner, R., Porticelli, F., 2014. Infectivity and transmission of  
714 *Xylella fastidiosa* by *Philaenus spumarius* (Hemiptera: Aphrophoridae) in Apulia,  
715 Italy. *Journal of Economic Entomology* 107, 1316-1319.
- 716 Saponari, M., Loconsole, G., Liao, H.H., Jiang, B., Savino, V., Yokomi, R.K., 2013b.  
717 Validation of high-throughput real time polymerase chain reaction assays for  
718 simultaneous detection of invasive citrus pathogens. *J. Virol. Methods* 193, 478-486.
- 719 Schrader, C., Schielke, A., Ellerbroek, L., Johne, R., 2012. PCR inhibitors - occurrence,  
720 properties and removal. *Journal of Applied Microbiology* 113, 1014-1026.
- 721 Severin, H.H.P., 1949. Transmission of the virus of Pierce's disease by leafhoppers. *Hilgardia*  
722 19, 190-202.
- 723 Severin, H.H.P., 1950. Spittle-insect vectors of Pierce's disease virus. II. Life history and  
724 virus transmission. *Hilgardia* 19, 357-382.
- 725 Shamim, G., Ranjan, S.K., Pandey, D.M., Ramani, R., 2014. Biochemistry and biosynthesis  
726 of insect pigments. *European Journal of Entomology* 111, 149-164.
- 727 Shcheglovitova, M., Anderson, R.P., 2013. Estimating optimal complexity for ecological  
728 niche models: a jackknife approach for species with small sample sizes. *Ecological*  
729 *Modelling* 269, 9--17.
- 730 Stamatakis, A., 2006. Phylogenetic models of rate heterogeneity: A High Performance  
731 Computing Perspective. *International Parallel and Distributed Processing Symposium*  
732 (IPDPS 2006), Rhodes Island, Greece, 8 pp.
- 733 Stamatakis, A., 2014. RAXML version 8: a tool for phylogenetic analysis and post-analysis of  
734 large phylogenies. *Bioinformatics* 30, 1312-1313.
- 735 Thorne, E.T., Stevenson, J.F., Rost, T.L., Labavitch, J.M., Matthews, M.A., 2006. Pierce's  
736 disease symptoms: comparison with symptoms of water deficit and the impact of  
737 water deficits. *American Journal of Enology and Viticulture* 57, 1-11.
- 738 Yang, Z., 1994. Maximum likelihood phylogenetic estimation from DNA sequences with  
739 variable rates over sites : approximate methods. *Journal of Molecular Evolution* 39,  
740 306-314.
- 741 Yaseen, T., Drago, S., Valentini, F., Elbeaino, T., Stampone, G., Digiario, M., D'Onghia,  
742 A.M., 2015. On site detection of *Xylella fastidiosa* in host plants and in "spy insects"  
743 using the real-time loop-mediated isothermal amplification method. *Phytopathologia*  
744 *Mediterranea* 54, 488-496.



- 745 Yaseen, T., Valentini, F., Santoro, F., Lorusso, D., D’Onghia, A.M., 2017. The “Spy Insect”  
746 approach for monitoring *Xylella fastidiosa* in absence of symptomatic plants In:  
747 D’Onghia, A.M., Brunel, S., Valentini, F. (Eds.), *Xylella fastidiosa & the Olive Quick*  
748 *Decline Syndrome (OQDS) A serious worldwide challenge for the safeguard of olive*  
749 *trees - IAM Bari: CIHEAM (Centre International de Hautes Etudes Agronomiques*  
750 *Méditerranéennes)*, 2017 – 172 p. (Série A Mediterranean Seminars, N° 121, Options  
751 *Méditerranéennes*).
- 752 Yuan, X., Morano, L., Bromley, R., Spring-Pearson, S., Stouthamer, R., Nunney, L., 2010.  
753 Multilocus sequence typing of *Xylella fastidiosa* causing Pierce's disease and oleander  
754 leaf scorch in the United States. *Phytopathology* 100, 601-611.  
755  
756  
757

758 **Tables and Figures**

759

760 **Figure 1. Map of the sampling sites and distance to the nearest focus of infection**  
761 **determined by molecular tests on plant material (national survey).**

762 A=all sampling sites, B=sampling sites where insect populations were tested for the presence  
763 of *Xf*. See Table S1 for more information on sampling sites.

764

765 **Figure 2. Results of the molecular tests performed on the insects (qPCR and nested**  
766 **PCR).**

767 The black histogram shows the distribution of the results of the qPCR replicates for the 448  
768 insects. N = negative, P = positive, U = undetermined (see text for the Ct). Thus NN indicates  
769 that the two replicates were negative. The red histogram indicates that positive nested PCR on  
770 *holC* were obtained.

771

772 **Figure 3. Prevalence of *Xf* in the different populations as revealed by the nested PCR**  
773 **approach targeting *holC*.**

774 Red (green) color indicates the percentage of insects tested positive (negative) for the  
775 presence of *Xf*. Tests were conducted on 32 specimens in each sample site.

776

777 **Figure 4. Position of the strains characterized in populations of insects in Corsica.**

778 A) RAxML tree inferred from the analysis of the reduced *holC* sequences targeted with the  
779 nested PCR approach (BP at nodes, 1000 replicates). Alleles present in

780 <https://pubmlst.org/xfastidiosa/> (last access October 19th 2017), genomes available on

781 Genbank (last access October 19th 2017) and alleles obtained from insect samples are

782 included in the analysis.

783 B) NeighborNet phylogenetic network.

784 Inferences are based on a concatenation of the reduced *leuA*, *petC*, *malF*, *cysG*, *holC*, *nuoL*,

785 *gltT* targeted with the nested PCR approach. STs present in <https://pubmlst.org/xfastidiosa/> as

786 well as genomes available on Genbank are included in the analysis (last access October 19th

787 2017). Insect samples for which at least two loci could be sequenced (JSTR03697\_0126 &

788 JSTR03697\_0129: 7 loci sequenced and MGOD00159\_0113 & JRAS06849\_0101 : *holC* and

789 *gltT* sequenced) are included in the network. Note: CO33 / ST72 (Giampetruzzi et al., 2015;

790 Loconsole et al., 2016); ST76 (Loconsole et al., 2016) ; CFBP8073 / ST75 (Jacques et al.,

791 2016) as well as ST79 (Denancé et al., 2017) are genetically related to isolates belonging to  
792 different subspecies of *Xf*.

793

794 **Figure 5. Potential geographical distribution of *Xf multiplex* (ST6/ST7) in Corsica.**

795 Suitability map averaging predictions by BIOCLIM and DOMAIN (from red/low to  
796 green/high suitability). Black dots indicate insect populations tested for the presence of *Xf*.  
797 See Godefroid et al. (submitted, see comments section below for preprint DOI) for details

798

799 **Figure 6. Occurrences and predicted distribution of *P. spumarius* in Europe.**

800 A. Plot of the occurrences recorded from GBIF, the literature and our own observations, B.  
801 Habitat suitability corresponds to the logistic output of the Maxent model (from red/low to  
802 green/high suitability).

803

804

805 **Table 1. *HolC* alleles present in each population of *P. spumarius*.**

806

807 **Figure 1.**  
808

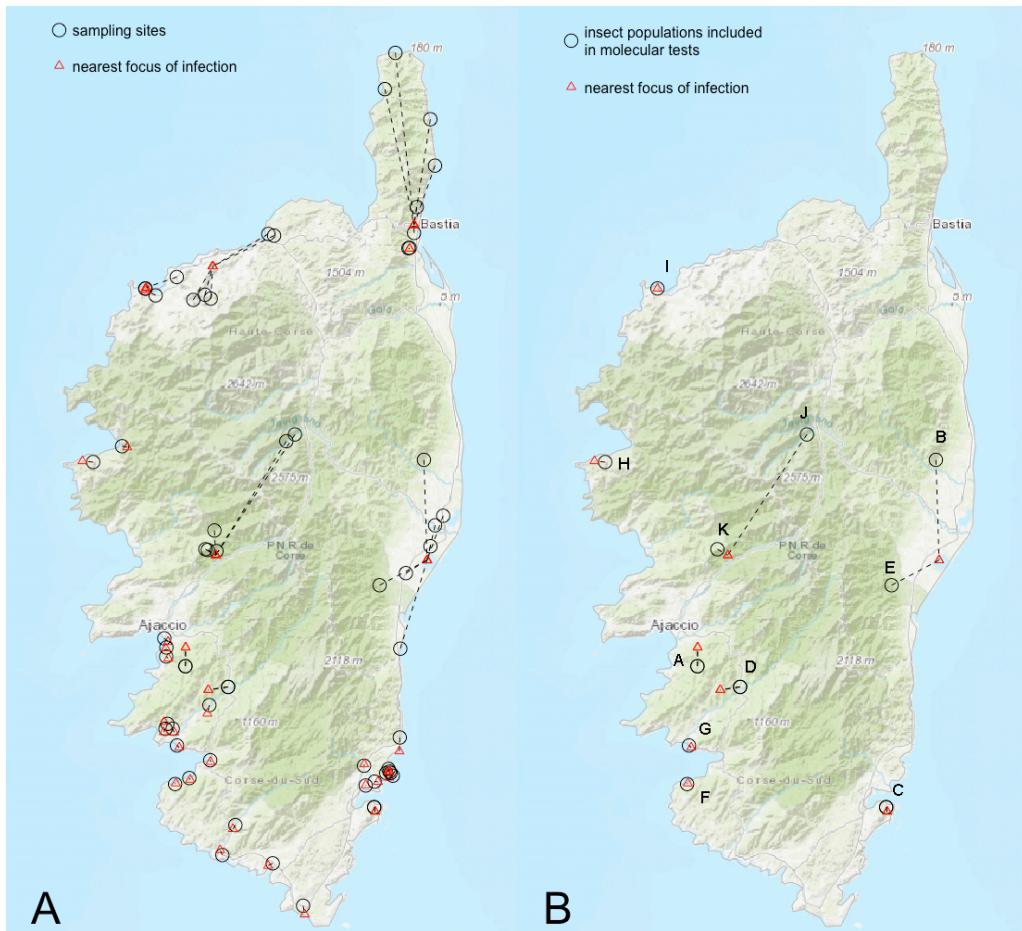

809

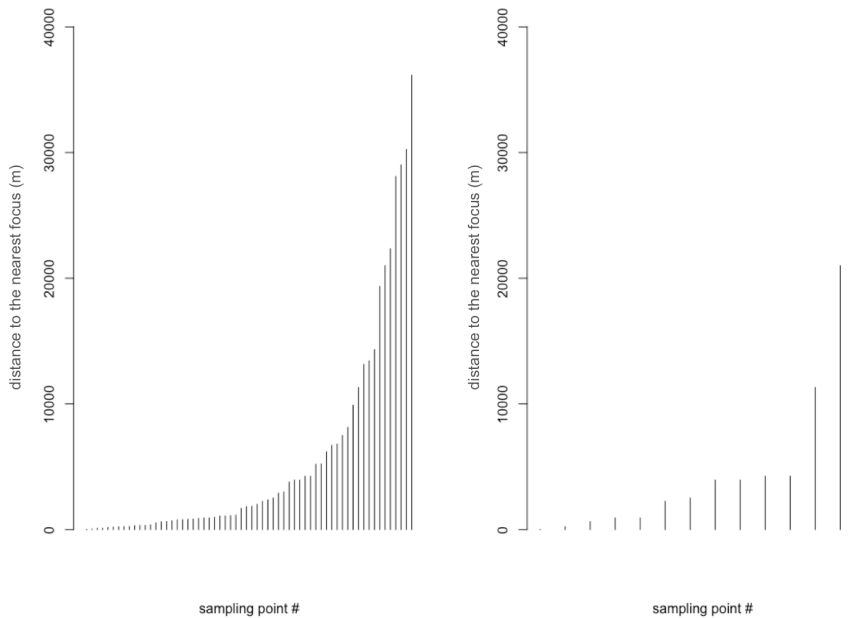

810  
811  
812  
813  
814

815 **Figure 2.**

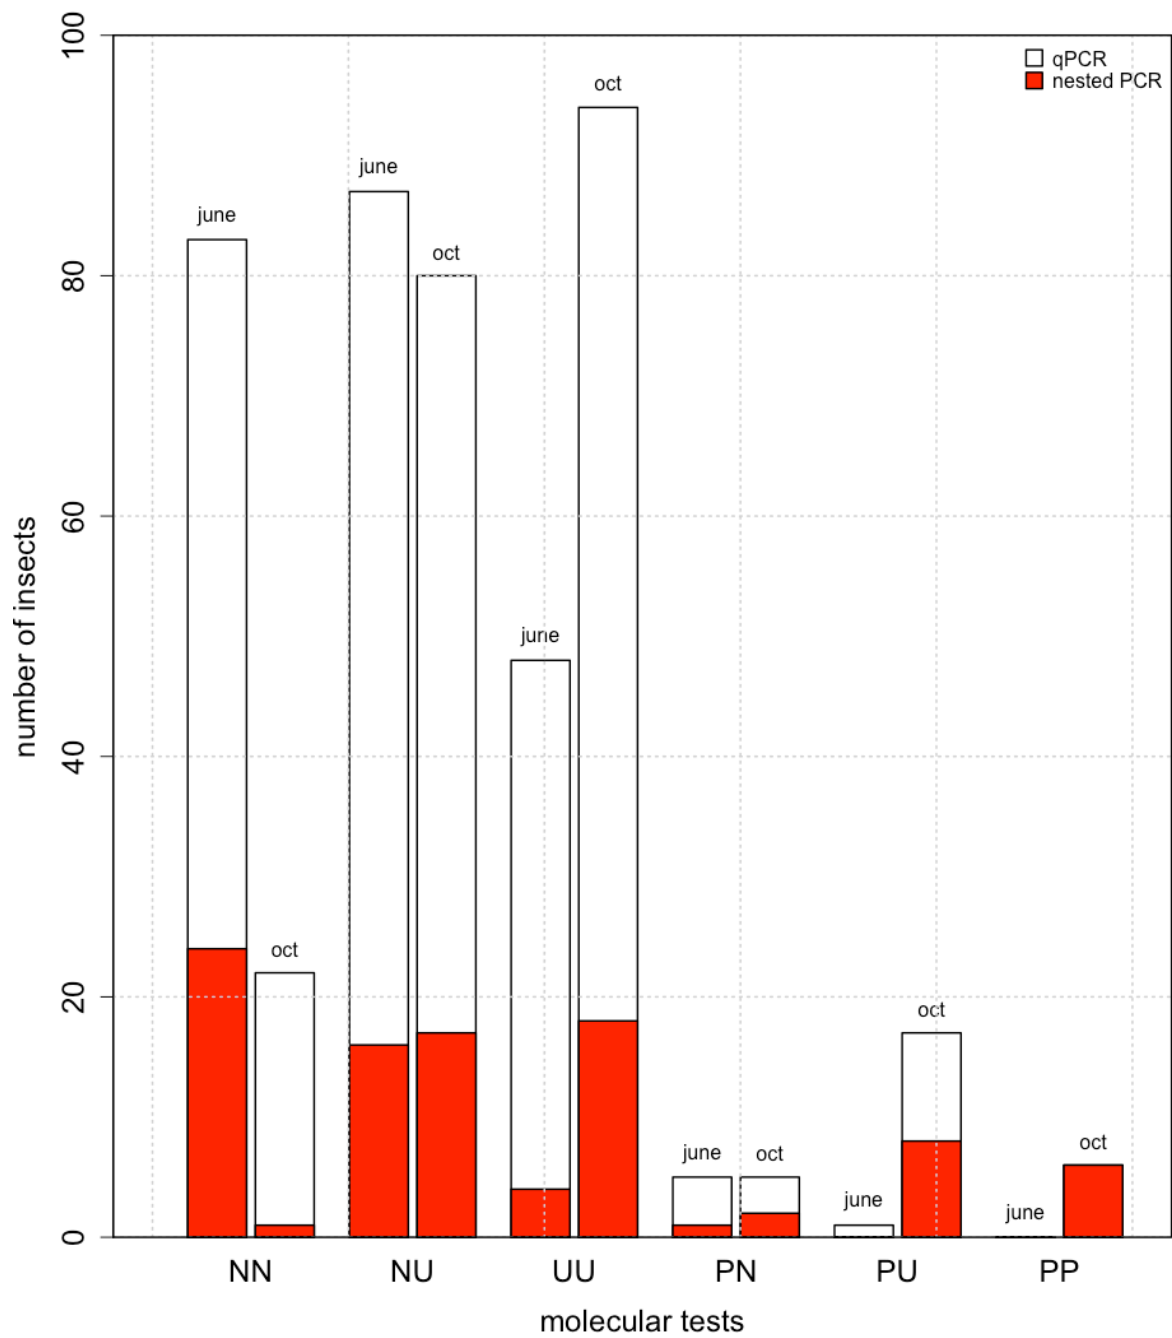

816  
817  
818  
819  
820

821 **Figure 3.**

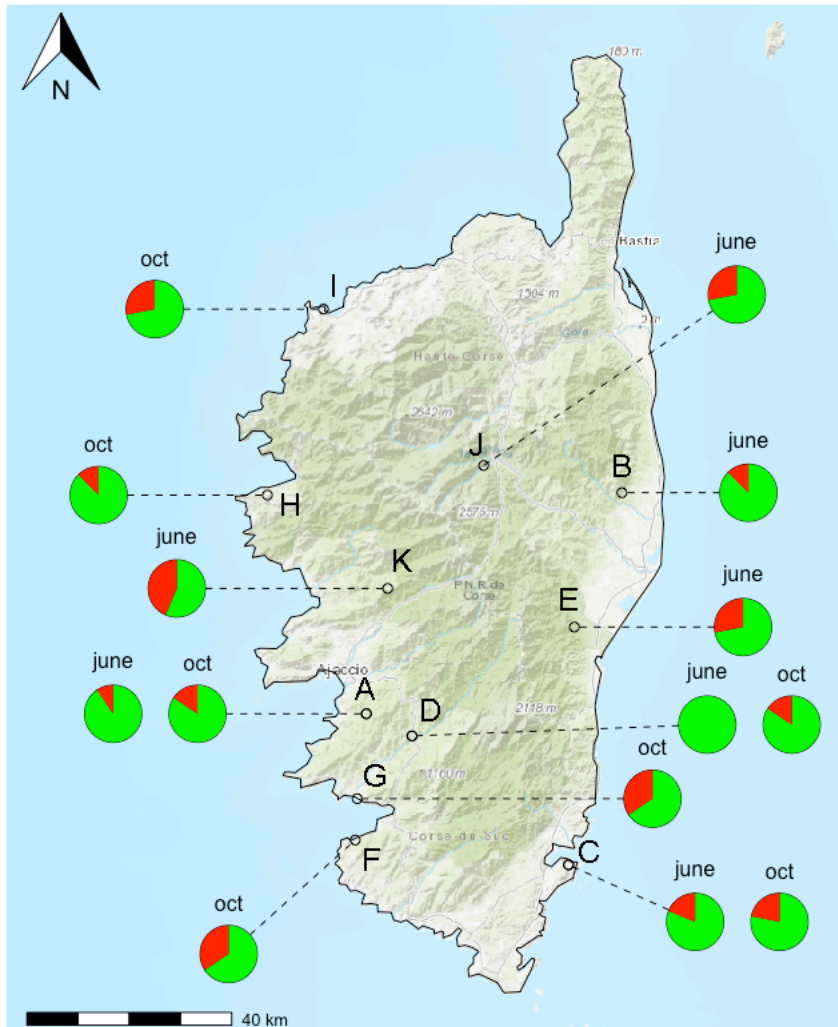

822  
823



824 **Figure 4.**  
825 **A**

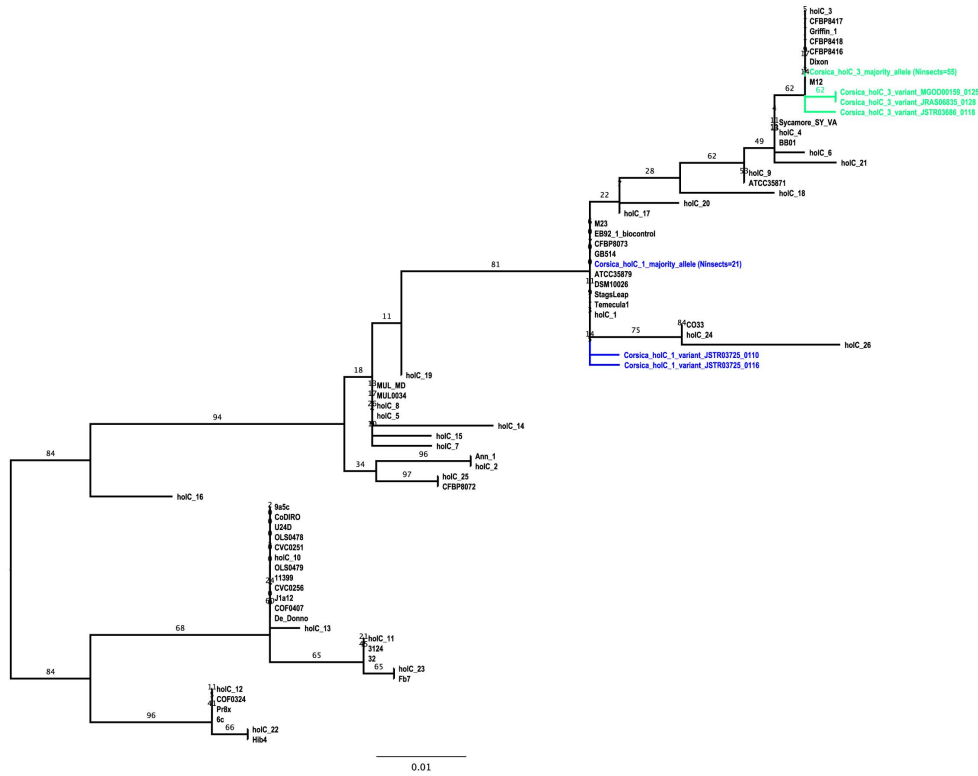

826 **B**  
827  
828

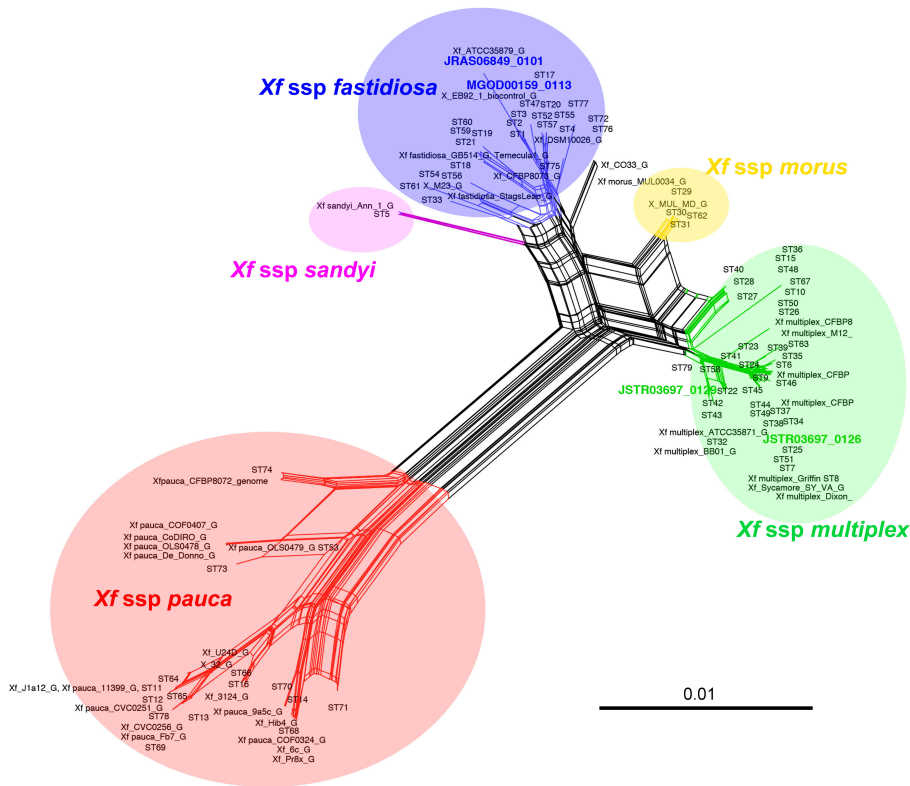

829

830 **Figure 5.**

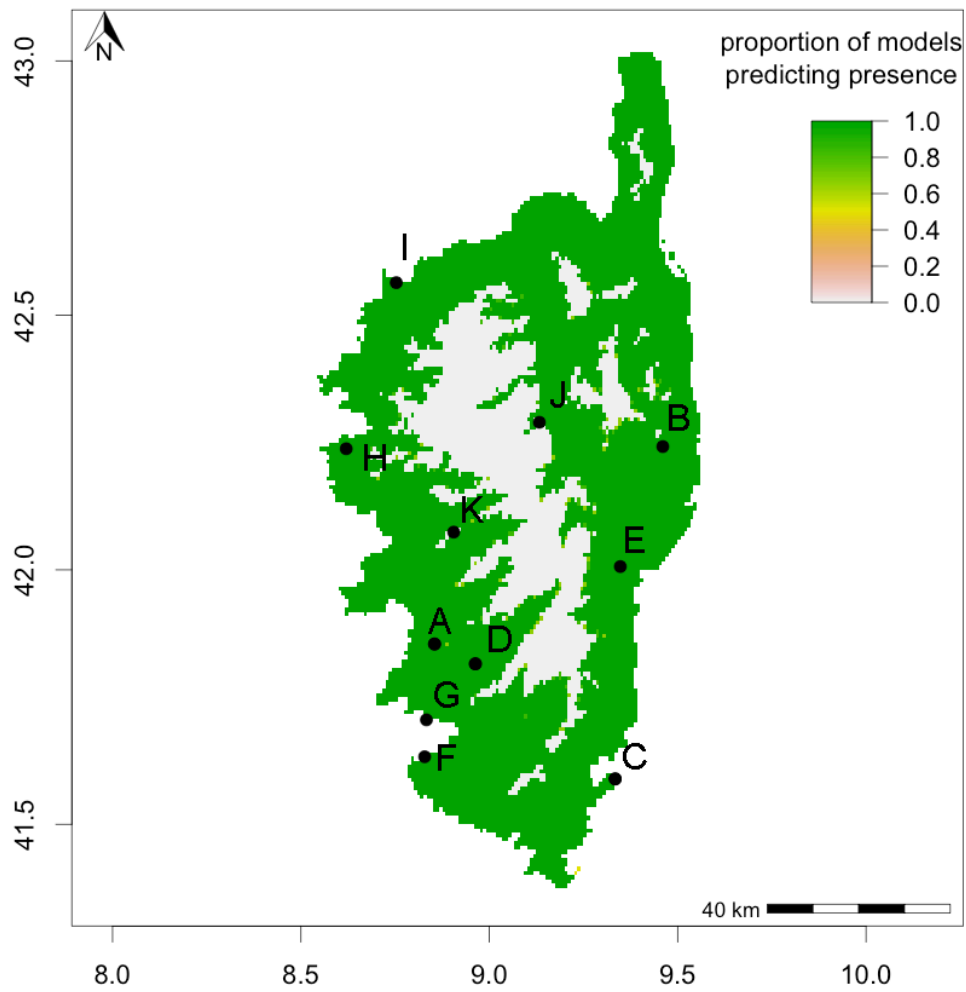

831  
832

833 **Figure 6.**  
834

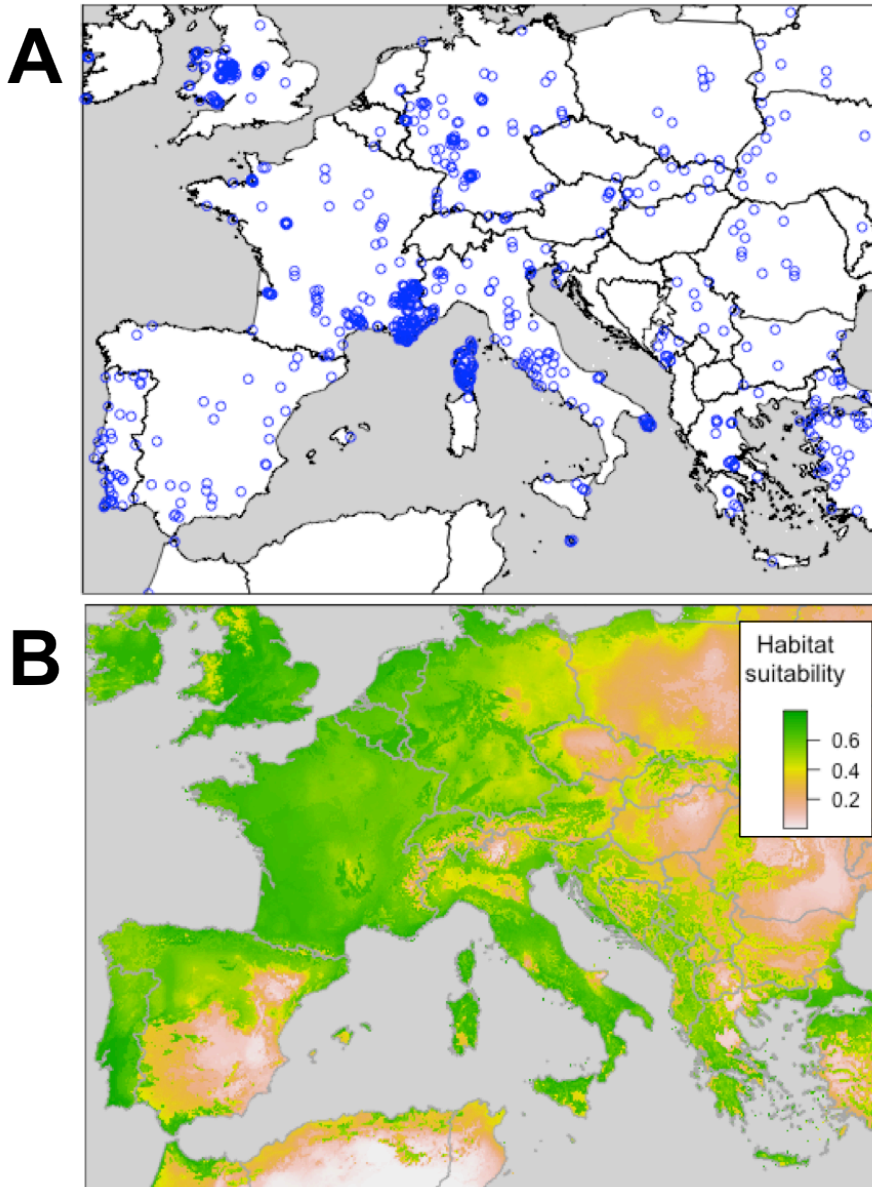

835  
836  
837  
838

839 **Table 1.**  
840

|                  | <i>holC 3</i> | <i>holC 1</i>  |
|------------------|---------------|----------------|
| Site A (June)    | 1             | 1              |
| Site A (October) | 2             | 2              |
| Site C (June)    | 5 + 1 variant | 0              |
| Site C (October) | 5             | 1              |
| Site D (June)    | 0             | 0              |
| Site D (October) | 3 + 1 variant | 0              |
| Site B           | 3             | 0              |
| Site E           | 1             | 7              |
| Site J           | 4             | 3              |
| Site K           | 6 + 1 variant | 2              |
| Site F           | 10            | 1              |
| Site G           | 9             | 1              |
| Site H           | 0             | 1 + 2 variants |
| Site I           | 6             | 2              |

841  
842  
843  
844  
845  
846  
847
